# Supplementary material for: Ultrasonographic Imaging and Anti-inflammatory Therapy of Muscle and Tendon Injuries Using Polymer Nanoparticles
Source: PubMed Central journal article supplement — Theranostics. 2017 Jun 24;7(9):2463–76. doi: 10.7150/thno.18922 (PMC5525750; doi:10.7150/thno.18922), 2017-06-24
Supplement: thnov07p2463s1.pdf [file thnov07p2463s1.pdf]

### Supplementary Figure Captions

Figure S1. Quantitative analysis of ultrasound imaging of Fig. 3B. Data are mean  $\pm$ s.d. (n=4).  
\*\*\*p<0.001, relative to contusion only.

Figure S2. Quantitative analysis of ultrasound imaging of Fig. 3C. Data are mean  $\pm$ s.d. (n=4).  
\*p<0.05, \*\*\*p<0.001, relative to contusion only.

Figure S3. Quantitative analysis of ultrasound imaging of Fig. 4B. Data are mean  $\pm$ s.d. (n=4).  
\*\*\*p<0.001, relative to contusion only.

Figure S4. Cytotoxicity of PVAX nanoparticles against RAW264.7 cells. Data are mean  $\pm$ s.d. (n=4).

Figure S5. H&E staining of organs of mice treated with PVAX nanoparticles.

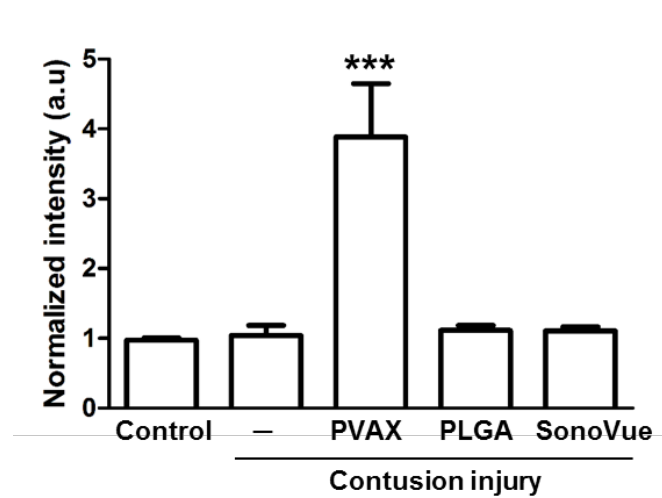

Figure S1.

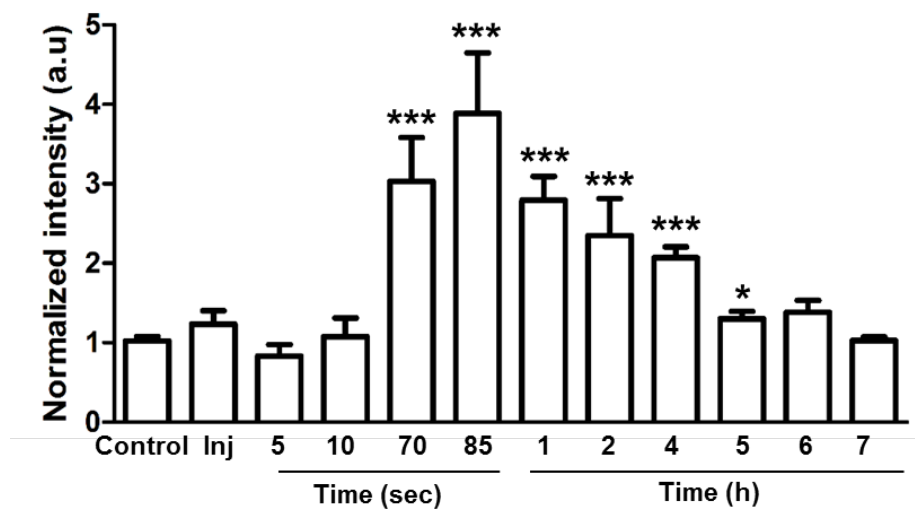

Figure S2.

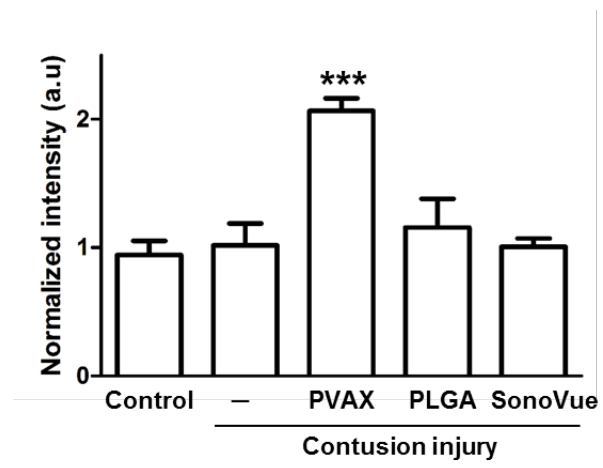

Figure S3.

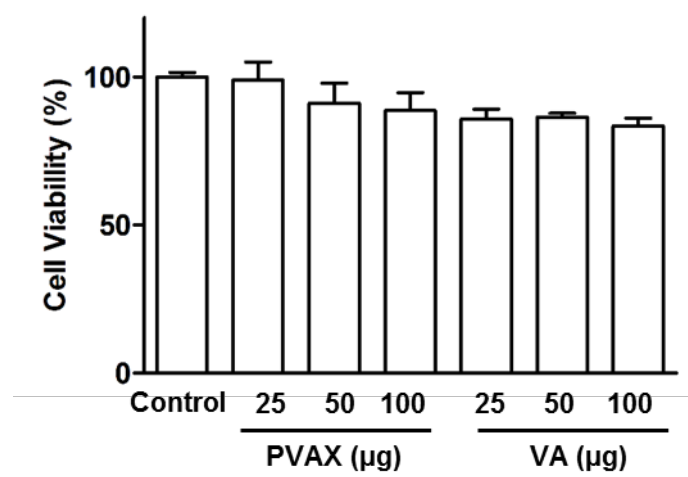

Figure S4.

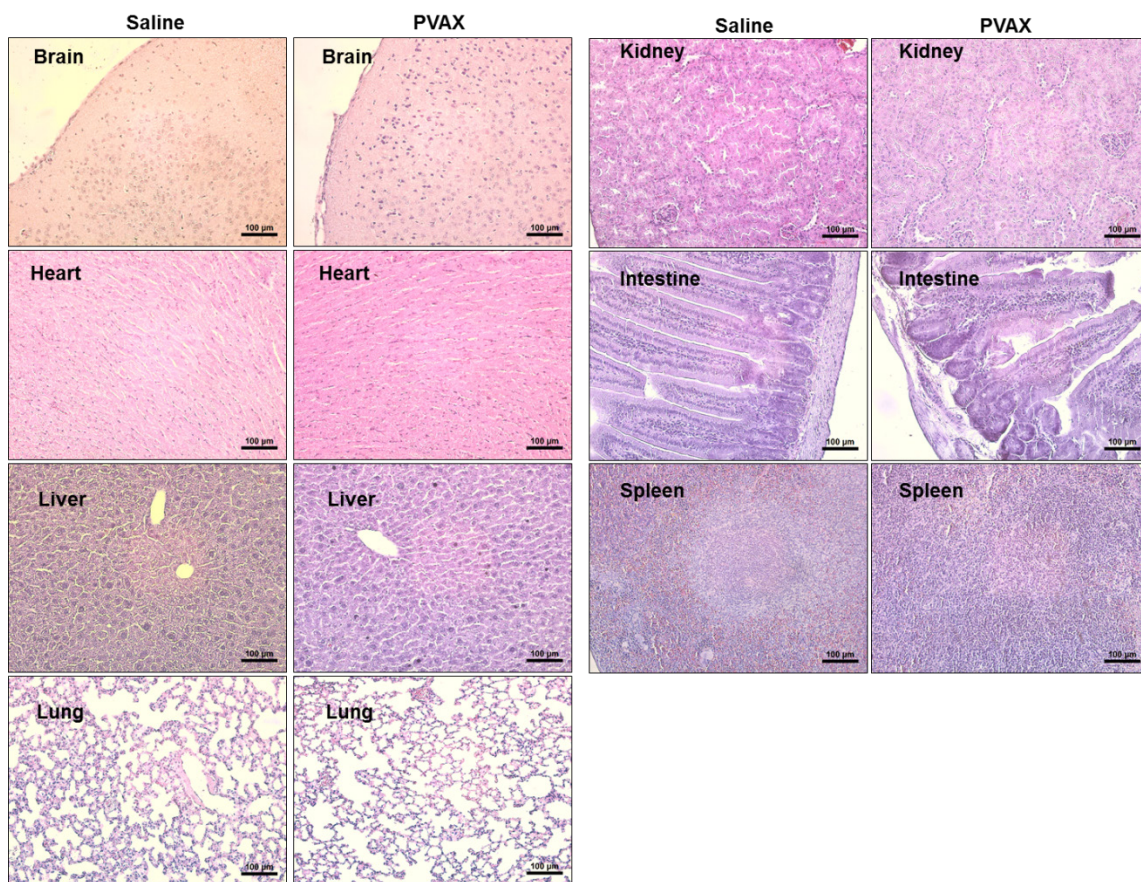

Figure S5.
